# Supplementary material for: Relating Standardized Automated Perimetry Performed with Stimulus Sizes III and V in Eyes With Field Loss due to Glaucoma and NAION
Source: PubMed Central journal article supplement — medRxiv. 2024 Aug 3:2024.08.01.24311376. Preprint. [Version 1] doi: 10.1101/2024.08.01.24311376 (PMC11312634; doi:10.1101/2024.08.01.24311376), 2024-08-03
Supplement: NIHPP2024.08.01.24311376v1-supplement-1.pdf [file NIHPP2024.08.01.24311376v1-supplement-1.pdf]

269 SD of Differences Between StimIII and StimV Pairs Across Censoring Thresholds

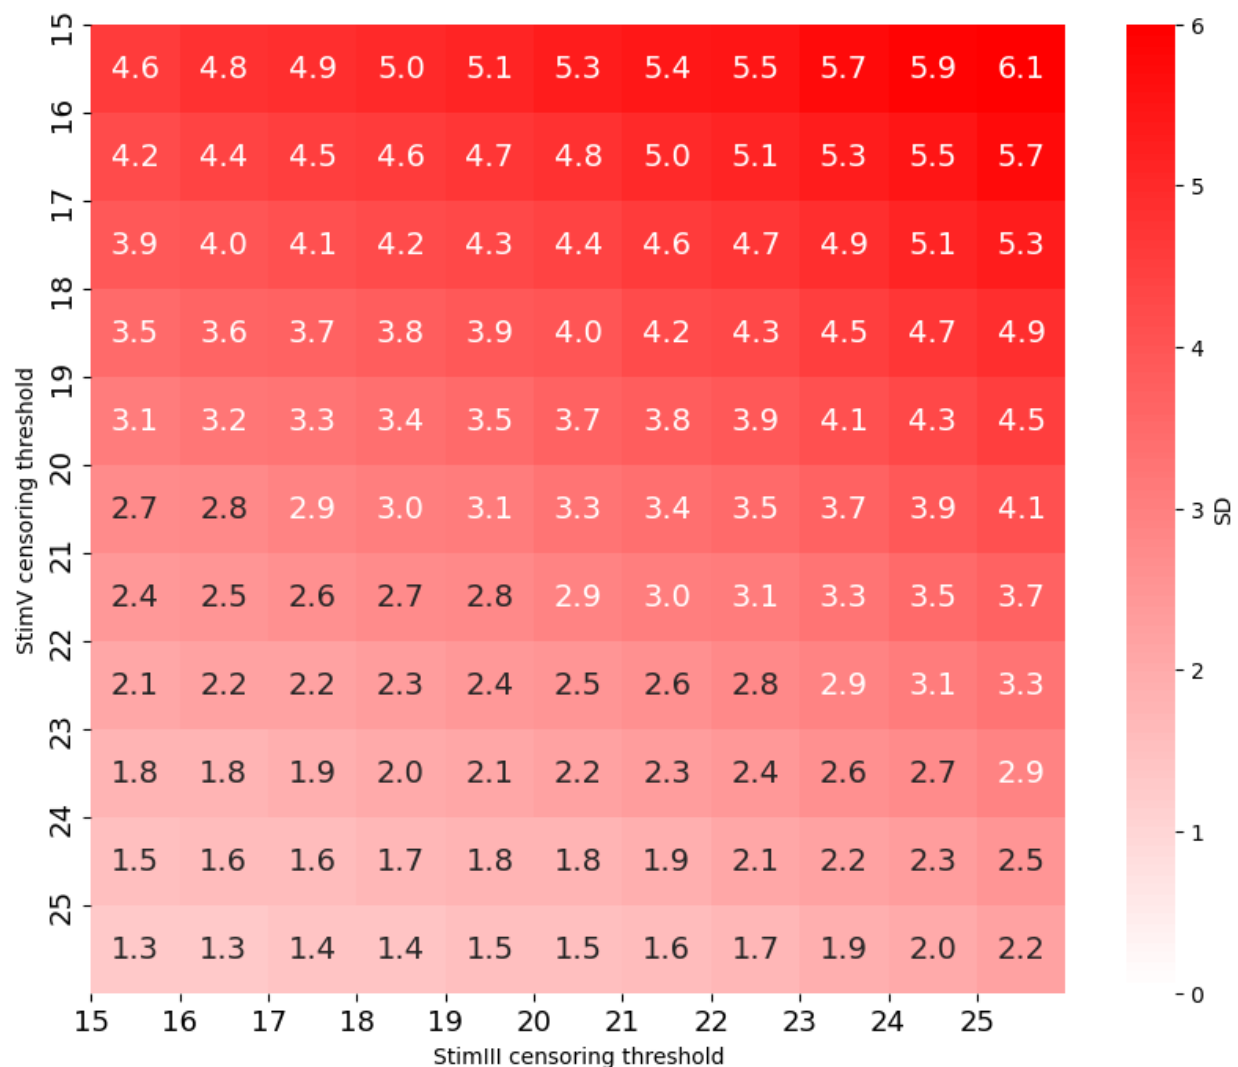

270  
271 **Supplemental Figure 1.** Heatmap depicting the standard deviation of total deviation  
272 differences between pairs of stimulus size III and stimulus size V points across varying  
273 censoring thresholds where at least one stimulus was censored. For the optimal  
274 censoring threshold of 21 dB for stimulus size III and 24 for stimulus size V, the  
275 standard deviation is 1.9 dB.

276

277 References
